# Supplementary material for: Haploinsufficiency of EHMT1 improves pattern separation and increases hippocampal cell proliferation
Source: PubMed Central journal article supplement (PMC5223204; doi:10.1038/srep40284), 2017-01-10
Supplement: srep40284-s1.pdf [file srep40284-s1.pdf]

**Haploinsufficiency of EHMT1 improves pattern separation and increases hippocampal cell proliferation.**

Marco Benevento<sup>1\*</sup>, Charlotte A. Oomen<sup>1\*</sup>, Alexa E. Horner<sup>2,3,4,&</sup>, Houshang Amiri<sup>1,5</sup>, Tessa Jacobs<sup>1</sup>, Charlotte Pauwels<sup>1</sup>, Monica Frega<sup>1</sup>, Tjitske Kleefstra<sup>8</sup>, Maksym V. Kopanitsa<sup>2,¶</sup>, Seth G. N. Grant<sup>6</sup>, Timothy J. Bussey<sup>3,4</sup>, Lisa M. Saksida<sup>3,4</sup>, Catharina E.E.M. Van der Zee<sup>7</sup>, Hans van Bokhoven<sup>1,8</sup>, Jeffrey C. Glennon<sup>1</sup>, Nael Nadif Kasri<sup>1,8, ↑</sup>

<sup>1</sup>Department of Cognitive Neuroscience, Radboudumc, Donders Institute for Brain, Cognition and Behaviour, Nijmegen, the Netherlands

<sup>2</sup>Synome Ltd., Babraham Research Campus, Cambridge CB22 3AT, UK

<sup>3</sup>Department of Psychology, University of Cambridge, Cambridge, UK

<sup>4</sup>Behavioural and Clinical Neuroscience Institute, University of Cambridge, Cambridge, UK;

<sup>5</sup>Neuroscience Research Center, Institute of Neuropharmacology, Kerman University of Medical Sciences, Kerman, Iran

<sup>6</sup>Centre for Clinical Brain Sciences, Chancellors Building, University of Edinburgh, 49 Little France Crescent, Edinburgh EH16 4SB, UK

<sup>7</sup>Department of Cell Biology, Radboudumc, Radboud Institute for Molecular Life Sciences, Nijmegen, the Netherlands

<sup>8</sup>Department of Human Genetics, Radboudumc, Donders Institute for Brain, Cognition, and Behaviour, Nijmegen, the Netherlands

<sup>&</sup>Present address: Cambridge Admissions Office, University of Cambridge, Fitzwilliam House, 32 Trumpington Street, Cambridge CB2 1QY, UK

<sup>¶</sup>Present address: Charles River Discovery Research Services, Microkatu 1, 70210 Kuopio, Finland

\* Equal contribution.

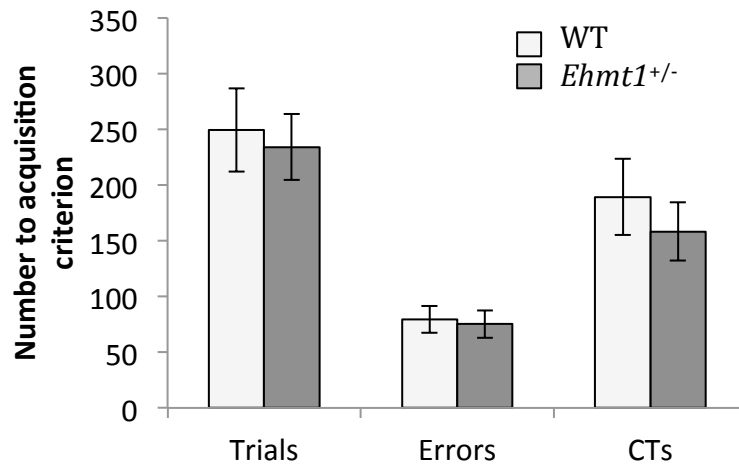

**Figure S1. Visual discrimination (VD) performance**

Performance of *Ehmt1*<sup>+/-</sup> and WT mice on VD acquisition, in terms of the number of trials, errors and correction trials (CTs) to criterion. Data presented as mean ± SEM. WT n =13, *Ehmt1*<sup>+/-</sup> n = 10. No significant differences between the groups were observed. Note that for VD no day-to-day acquisition averages exist, as the number of days mice required to reach criterion differed and animals were moved to Reversal learning individually

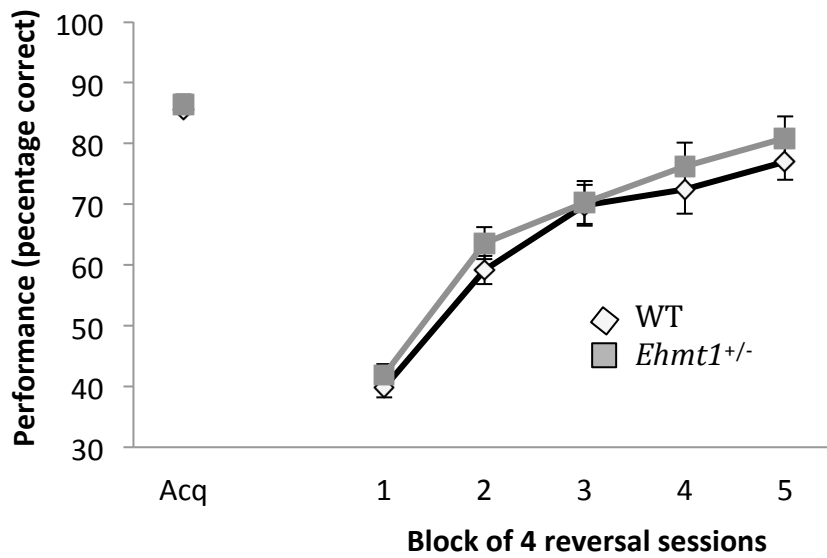

**Figure S2. Reversal learning - acquisition graph.**

Performance of *Ehmt1*<sup>+/-</sup> and WT mice on VD Reversal, in terms of performance (percentage correct) during the first 20 sessions of reversal, in blocks of 4 sessions. Acquisition (“Acq”) data point is the average of each mouse’s last two acquisition sessions. Data presented as mean ± SEM. WT n =13, *Ehmt1*<sup>+/-</sup> n = 10. Analysis of reversal across blocks of 4 sessions revealed a significant effect of block ( $p < 0.001$ ), no effect of interaction or genotype ( $p > 0.1$ ).

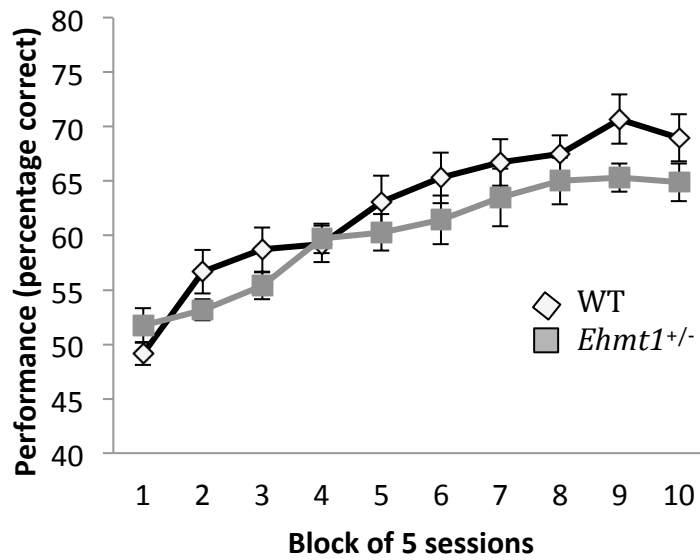

**Figure S3. Object-place paired associates learning (PAL) acquisition graph.**

Performance (percentage correct) of WT ( $n = 13$ ) and *Ehmt1*<sup>+/-</sup> ( $n = 10$ ) mice during PAL acquisition, in blocks of 5 sessions. Data presented as mean  $\pm$  SEM. Analysis of PAL acquisition revealed a significant main effect of block ( $F_{9,189} = 33.957$ ,  $p < 0.001$ ; Figure X), but no effect of genotype ( $F_{1,21} = 1.575$ ,  $p > 0.1$ ) or interaction of these factors ( $F_{9,189} = 1.398$ ,  $p > 0.1$ ).

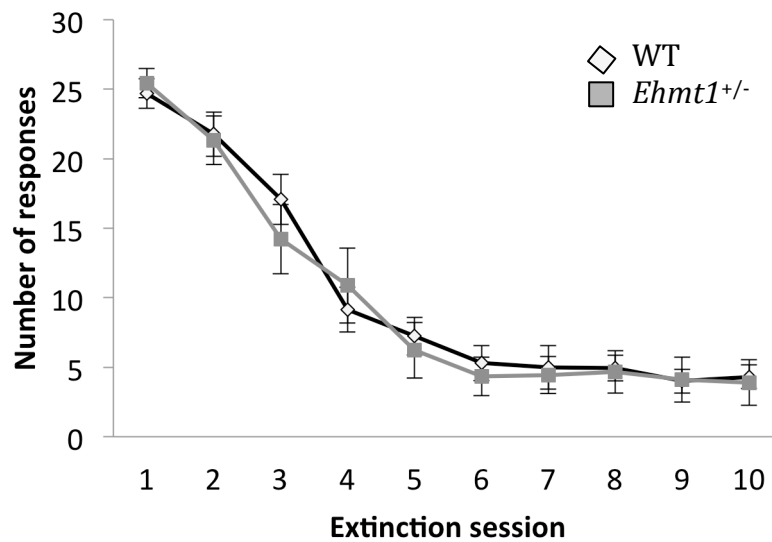

**Figure S4. Extinction learning acquisition graph.**

Performance (number of responses out of a possible 30) during the first 10 sessions of an appetitive instrumental extinction task. Data presented as mean  $\pm$  SEM. WT  $n = 13$ ; *Ehmt1*<sup>+/-</sup>  $n = 10$ . Responding during the first 10 sessions of extinction revealed a significant main effect of session (Huynh-Feldt-corrected RM ANOVA;  $F_{6.394, 127.883} = 73.415$ ,  $p < 0.001$ ), indicating that responding reduced with training. However, there was no significant effect of genotype or of an interaction between these factors (both  $F < 1$ ,  $p > 0.1$ ).

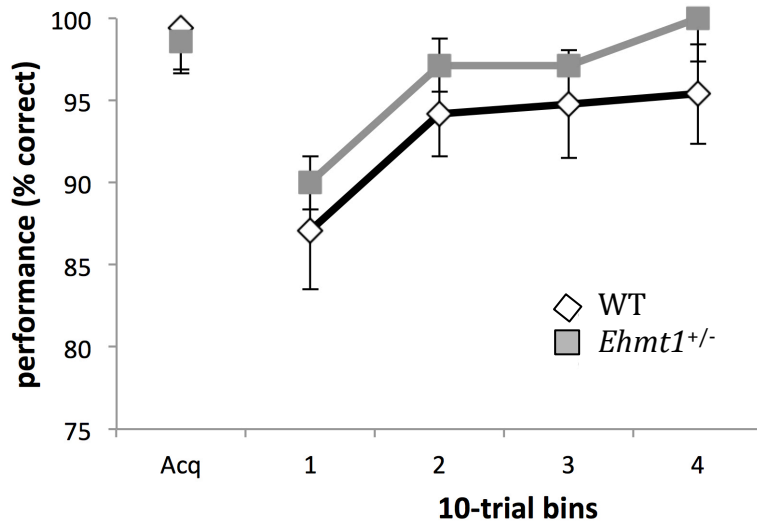

**Figure 5 Location Discrimination recall test**

Performance (percentage correct) on the recall session in the Location Discrimination test. Mice first acquired the location-reward contingency during three sessions without reversal (Acq; average of the final acquisition session) and were then re-tested after a 72 hour delay. Data depicted in bins of 10 trials and presented as mean  $\pm$  SEM. Both groups show a mild drop in performance during the first 10-trial bin, however, no significant effect of genotype or of an interaction between genotype and bin was found (both  $F < 1$ ,  $p > 0.1$ ).
